# **Moraxellaceae and *Moraxella* interact with the altered airway mycobiome in asthma**

2 Hai-yue Liu<sup>a,b,c,\*</sup>, Chun-xi Li<sup>a,\*</sup>, Zhen-yu Liang<sup>d</sup>, Shi-yu Zhang<sup>a</sup>, Wan-ying Yang<sup>a</sup>,  
Yan-mei Ye<sup>a</sup>, Yan-xia Lin<sup>a</sup>, Rong-chang Chen<sup>d</sup>, Hong-wei Zhou<sup>b,c,#</sup>, Jin Su<sup>a#</sup>

4 Affiliations: Department of Respiratory and Critical Care Medicine, Chronic Airways  
Diseases Laboratory, Nanfang Hospital, Southern Medical University, Guangzhou,  
6 China<sup>a</sup>; State Key Laboratory of Organ Failure Research, Division of Laboratory  
Medicine, Zhujiang Hospital, Southern Medical University, Guangzhou, China<sup>b</sup>;  
8 Microbiome Medicine Center, Zhujiang Hospital, Southern Medical University,  
Guangzhou, China<sup>c</sup>; and State Key Laboratory of Respiratory Disease, National Clinical  
10 Research Center for Respiratory Disease, Guangzhou Institute of Respiratory Health, the  
First Affiliated Hospital of Guangzhou Medical University, Guangzhou, China<sup>d</sup>. \*These  
12 authors contributed equally to this work. #Both authors contributed equally.

14 Correspondence: Dr. Jin Su, Department of Respiratory and Critical Care Medicine,  
Chronic Airways Diseases Laboratory, Nanfang Hospital, Southern Medical University,  
16 Guangzhou, China. E-mail: drsujin@126.com. Telephone: +8613711193283.

Dr. Hong-wei Zhou, State Key Laboratory of Organ Failure Research, Division of  
18 Laboratory Medicine, Zhujiang Hospital, Southern Medical University, Guangzhou,  
China. E-mail: biodegradation@gmail.com. Telephone: +8618688489622.

20

Running title: Moraxellaceae, *Moraxella* and airway mycobiome

22    **ABSTRACT** Airway microbial-microbial interaction plays an important role in chronic  
 24    airway inflammatory diseases such as asthma. *Moraxella* is widely regarded as a human  
 26    respiratory tract pathogen. We aimed to investigate the interactions among *Moraxella*,  
 28    Moraxellaceae (to which *Moraxella* belongs) and the airway microbiome in asthma.  
 30    Induced sputum samples were obtained from 116 asthma patients and 29 healthy  
 32    individuals, and the bacterial/fungal communities were profiled using 16S rRNA and  
 34    ITS1 DNA gene sequencing. We found that asthma patients harboured significantly  
 36    greater airway bacterial and fungal  $\alpha$ -diversity than that of healthy individuals.  
 38    Moraxellaceae, *Moraxella* and *Moraxella* otu19 (bacteria), and Schizophyllaceae,  
 40    Polyporaceae, *Aspergillus*, *Schizophyllum* and *Candida* (fungi) were increased in the  
 42    airway of asthma. Moreover, Moraxellaceae, Schizophyllaceae, Polyporaceae and  
*Candida* were positively associated with airway fungal  $\alpha$ -diversity. Correlation networks  
 revealed Moraxellaceae and *Moraxella* as microbial “hubs” in asthma that had significant  
 negative connections with multiple bacterial communities, such as Leptotrichiaceae,  
 Lachnospiraceae, Peptostreptococcaceae, Porphyromonadaceae, *Prevotella*, *Veillonella*,  
*Rothia* and *Leptotrichia*, but positive interactions with fungal communities such as  
 Schizophyllaceae, Polyporaceae, *Candida* and *Meyerozyma*. Together, our finding  
 revealed an altered microbiome and complex microbial-microbial interactions in the  
 airway of asthma. Moraxellaceae and *Moraxella* showed significant interactions with the  
 airway mycobiome, providing potential insights into the novel pathogenic mechanisms of  
 asthma.

**IMPORTANCE** With the advent of culture-independent techniques, growing evidence

44 suggests that the airway microbiome is closely correlated with chronic respiratory  
diseases such as asthma. The complex microbial-microbial interaction exists in the  
46 airways of both healthy individuals and patients with respiratory diseases, which is of  
great significance for the pathogenesis and disease progression of asthma. In this study,  
48 we evaluated the airway dysbiosis in asthma patients, described the interaction between  
Moraxellaceae, *Moraxella* and airway bacterial/fungal communities, and it contributes to  
50 further understanding the pathogenic mechanisms of asthma.

**KEYWORDS:** asthma, airway microbiome, mycobiome, interaction, 16S rRNA, ITS

52

## INTRODUCTION

54 Asthma is a common airway condition characterized by chronic airway  
inflammation that affects approximately 300 million people worldwide (1). Recently, new  
56 culture-independent techniques have revealed that human airways harbour unique  
microbial communities (including bacteria, fungi and viruses) that are closely correlated  
58 with chronic lung diseases such as asthma (2-4). The airway bacterial community in  
asthma patients differs significantly from that of healthy individuals, with increased  
60 bacterial diversity, and more Proteobacteria, especially *Moraxella*, and fewer  
Bacteroidetes (2).

62 Increasing evidence indicates that the airway bacterial microbiome plays an important  
role in asthma. In a study of more than 600 infants at 1 month of age, *Moraxella*

*catarrhalis*, *Haemophilus influenzae* or *Streptococcus pneumoniae* cultured from the oropharynx was correlated with increased risks of later wheezing and asthma (5). Culture-independent techniques have suggested that airway bacteria may cause asthma and affect asthma activity (6). Several studies have indicated that airway bacteria are correlated with disease-related features and with the severity and therapeutic response of asthma (7-10). *Moraxella* is currently regarded as an important and common pathogen in the human respiratory tract and is associated with a range of diseases such as sinusitis, tracheitis, bronchitis and pneumonia in children and bronchitis, pneumonia and nosocomial infections in adults (11), as well as with exacerbation of asthma (12). In many asthma patients, *Moraxella catarrhalis* is a dominant pathogen in the airway bacterial community (10) and is one of the most frequently isolated bacteria from sputum cultures from patients with asthma exacerbations (13).

Recently, the presence of the fungal microbiome (mycobiome) in both healthy and abnormal lungs has been increasingly recognized, and this mycobiome may impact the clinical course of chronic pulmonary diseases such as asthma (14). One previous study identified differences in the airway mycobiome between asthma patients and healthy controls by using standard PCR techniques and pyrosequencing (15).

Airway bacterial-bacterial interactions are known to be associated with immune responses and airway inflammatory processes (16), thereby influencing the therapeutic response and clinical outcome of lung diseases (17). Recent findings have provided insights on the airway bacterial-fungal interaction, which may contribute to the decline in

lung function and to disease progression (18) and is important in respiratory disease settings (19). However, fungal-bacterial interactions in asthma have not been studied extensively using culture-independent methods, and relatively little is known about the interaction among *Moraxella*, Moraxellaceae (to which *Moraxella* belongs) and the airway mycobiome in asthma.

Recognizing that complex airway microbial communities and microbial-microbial interactions play an increasingly important role in the development and progression of asthma (16, 19-21), we conducted a cross-sectional study to explore the alterations of Moraxellaceae and *Moraxella* in asthma airways as well as the interactions among Moraxellaceae, *Moraxella* and the airway mycobiome. We aimed to provide new insights on airway microbial characteristics, bacterial-fungal interactions, and the potential pathogenic mechanisms of asthma.

## RESULTS

**Clinical characteristics of the subjects.** A total of 145 sputum samples were obtained from 116 asthma patients (55 stable asthma patients and 61 exacerbated asthma patients) and 29 healthy subjects. After the sequencing analysis, samples from 128 and 145 participants were analysed for bacterial and fungal community composition data, respectively. No significant differences were found in age, gender or smoking history between the healthy and asthmatic groups. Patients with stable asthma had more ICS usage than patients with exacerbated asthma ( $P=0.017$ ) (Table 1).

106

# **Airway bacterial and fungal communities in asthma patients differed from**

108 **those in healthy individuals.** Compared with healthy individuals, asthma patients showed a significantly greater airway  $\alpha$ -diversity (calculated using the Shannon index and PD\_whole\_tree index) (Fig. 1) and distinct differences in the community compositions ( $\beta$ -diversity) (Fig. S1A) of both bacterial and fungal communities.

112 In addition, we compared the airway bacterial and fungal community compositions (relative abundance >1%) between asthma patients and healthy individuals (Table S1).  
114 Asthma patients harboured a slightly higher abundance of Proteobacteria ( $P=0.222$ ) and an extremely increased abundance of Moraxellaceae, *Moraxella* and *Moraxella* otu19 in  
116 the airway than healthy individuals (Fig. 2). Among these selected bacterial and fungal communities, more than 70% of the fungal community differed significantly between  
118 asthma patients and healthy individuals, especially Ascomycota, Basidiomycota, Schizophyllaceae, Polyporaceae, *Aspergillus*, *Schizophyllum*, *Candida* and *Meyerozyma*,  
120 which were more prevalent in asthma patients, while only 20-45% of the bacterial community differed significantly between the two groups, suggesting that the airway  
122 fungal community had a more varied and complex dysbiosis than the bacterial community in asthma.

124 Bronchial hyperresponsiveness in outpatients with asthma may affect the airway microbiome (22). Accordingly, we divided the asthmatic population into two  
126 subgroups—stable asthma and exacerbated asthma—according to disease activity.

However, both the microbial  $\alpha$ -diversity (Shannon index, bacteria:  $P=0.554$ , fungi:  $P=0.316$ , respectively) and  $\beta$ -diversity (bacteria:  $R^2=0.009$ ,  $P=0.269$ , fungi:  $R^2=0.008$ ,  $P=0.549$ , respectively) were similar, and no significant differences in either bacterial or fungal community composition were found between the two subgroups (Fig. S2).

Although not statistically significant, the phylum that exhibited the greatest increase in asthma was Proteobacteria. We therefore evaluated the overall families belonging to Proteobacteria. We found that the relative abundance of Moraxellaceae was significantly higher in asthma patients than in healthy individuals (80.5-fold,  $P=0.007$ ) (Fig. 2). However, the abundances of other families (average abundance  $>1\%$ ), such as Neisseriaceae and Pasteurellaceae, were not significantly increased, and some were even decreased; for example, Burkholderiaceae was lower in asthma patients ( $P=0.041$ ) (Fig. S1B). Focusing on the distinct difference in Moraxellaceae between asthma patients and healthy individuals, we further compared the different microbes at the genus level and OTU level. In agreement with the results for Moraxellaceae, *Moraxella* and *Moraxella* otu19 were significantly increased in asthma patients (314.7-fold,  $P=0.027$ ; not detected in healthy individuals,  $P=0.029$ , respectively) (Fig. 2).

**Relationship among Moraxellaceae, *Moraxella* and airway bacterial/fungal diversity.** As shown above, the airway microbial diversity in asthma patients differed from that in healthy individuals. Thus, we explored whether there was a relationship among the increased Moraxellaceae, *Moraxella* and airway bacterial/fungal  $\alpha$ -diversity in

asthma.

We first focused on the bacterial diversity and found no significant relationships among Proteobacteria, Moraxellaceae, *Moraxella*, *Moraxella* otu19 and bacterial diversity. However, a significantly positive correlation was found between Moraxellaceae and fungal diversity (Fig. 3). Next, we investigated whether the airway fungal community was related to fungal diversity and found that Basidiomycota, Schizophyllaceae, *Schizophyllum*, *Schizophyllum commune* otu6, *Aspergillus* otu5, Polyporaceae and *Candida* were positively correlated with fungal diversity (all *P* values<0.001) (Fig. S3). Our findings suggested that Moraxellaceae had a greater influence on the fungal community than the bacterial community in the asthma airway.

#### **Interaction among Moraxellaceae, *Moraxella* and the airway mycobiome.**

To further explore the interaction among the increased Moraxellaceae, *Moraxella* and the airway microbiome in asthma, we used Spearman correlation analysis to build correlation networks (Fig. 4).

Examination of the microbial network revealed a few microbial “hubs” that were negatively connected with other portions of the airway microbiome. At the phylum level, Proteobacteria was significantly negatively associated with Firmicutes, Bacteroidetes and Actinobacteria but significantly positively correlated with Ascomycota and Basidiomycota. At the family level, Moraxellaceae showed 9 negative correlations with bacterial families, including with Veillonellaceae, Lachnospiraceae, Leptotrichiaceae,



Prevotellaceae, Peptostreptococcaceae and Porphyromonadaceae, but 2 positive  
 170 correlations with Schizophyllaceae and Polyporaceae. Moreover, Schizophyllaceae,  
 Polyporaceae and Trichocomaceae exhibited strong positive correlations with each other  
 172 and were negatively correlated with Leptotrichiaceae, Lachnospiraceae,  
 Peptostreptococcaceae and Mogibacteriaceae. At the genus level, *Moraxella* was  
 174 negatively associated with 7 bacterial genera (*Veillonella*, *Leptotrichia*, *Rothia*,  
*Streptococcus*, *Peptostreptococcus*, *Prevotella* and *Lautropia*) and positively associated  
 176 with 2 fungal genera (*Candida* and *Meyerozyma*). *Candida* was positively related to  
*Aspergillus* and *Schizophyllum* but negatively linked to *Peptostreptococcus* and  
 178 *Streptococcus*. *Meyerozyma* was negatively associated with *Prevotella* and *Veillonella*. At  
 the OTU level, *Moraxella* otu19 was significantly negatively associated with *Veillonella*  
 180 *parvula* otu22, *Streptococcus* otu5, *Peptostreptococcus* otu16 and Unclassified Fungi  
 otu20 but significantly positively associated with *Schizophyllum commune* otu6 and  
 182 Unclassified Fungi otu12. Additionally, *Schizophyllum commune* otu6 was negatively  
 correlated with *Neisseria* otu1 and Unclassified Fungi otu1. Taken together, these results  
 184 suggested complex and close interactions among Moraxellaceae, *Moraxella* and airway  
 microbial communities (12 out of 21 communities and 10 out of 18 communities,  
 186 respectively), especially the fungal community (Schizophyllaceae, Polyporaceae,  
*Candida* and *Meyerozyma*).

## DISCUSSION

Asthma is a chronic airway inflammatory disease associated with altered microbial communities in the airway, and these communities are closely related to airway inflammation. Recent studies have highlighted the importance of the complex microbial-microbial interactions in asthma (16, 18, 19). In addition to bacterial dysbiosis (23), we concurrently identified fungal dysbiosis characterized by alterations in diversity and composition in the asthma airway. We found that Moraxellaceae was positively associated with airway fungal diversity. Moraxellaceae and *Moraxella* showed positive interactions with Schizophyllaceae, Polyporaceae, *Candida* and *Meyerozyma* but negative interactions with Leptotrichiaceae, Lachnospiraceae, Burkholderiaceae, Mogibacteriaceae, Peptostreptococcaceae, Porphyromonadaceae, *Prevotella*, *Veillonella*, *Rothia*, *Leptotrichia* and *Streptococcus*, which were enriched in healthy individuals, indicating that Moraxellaceae and *Moraxella* interact with the altered airway mycobiome in asthma.

Our findings revealed significant differences in airway microbial diversity and community composition between asthma patients and healthy individuals. In agreement with previous studies, we found that asthma patients harboured a higher bacterial  $\alpha$ -diversity (22, 23) and greatly increased proportions of Moraxellaceae and *Moraxella* in the airway compared with healthy individuals. Airway dysbiosis in asthma was evident not only in the bacterial community but also in the fungal community. Our study is the first to report that asthma patients have greater fungal  $\alpha$ -diversity (1.6-fold greater Shannon index and 1.2-fold greater PD\_whole\_tree compared with healthy individuals) and more complicated fungal composition dysbiosis compared with bacterial dysbiosis

(71.4-100% vs. 20-45%) in the airway.

*Moraxella* is widely recognized as a pathogen in the airway and is associated with several respiratory diseases such as asthma (11, 12). Multiple studies have reported altered airway microbial dysbiosis, with pathogenic Proteobacteria more frequently found in asthma (2, 22-25), and we found that this increase occurred mainly because of the increases in Moraxellaceae and *Moraxella*, which were 80.5-fold and 314.7-fold more abundant than in healthy individuals, respectively.

Previous studies demonstrated bacterial-bacterial interactions in chronic airway diseases such as asthma (16, 19). Our results showed unique microbial networks in asthma. Moraxellaceae and *Moraxella* were negatively correlated with 9 and 7 bacterial communities respectively, most of which included Leptotrichiaceae, Lachnospiraceae, Burkholderiaceae, Peptostreptococcaceae, Porphyromonadaceae, Mogibacteriaceae, *Prevotella*, *Veillonella*, *Rothia*, *Leptotrichia* and *Streptococcus*. These communities have been more prevalently found in healthy airways either in our findings or in previous studies (9, 23, 26, 27), suggesting that Moraxellaceae and *Moraxella* drive airway dysbiosis by inhibiting the commensal microbiome.

In the present study of airway microbial composition, Moraxellaceae had a greater influence on the  $\alpha$ -diversity of fungi than bacteria. The dynamic interaction between bacteria and fungi may have dramatic effects on airway inflammatory processes (18, 28). The correlation network showed positive correlations connecting Moraxellaceae and *Moraxella* with Schizophyllaceae, Polyporaceae, *Candida* and *Meyerozyma*.

232 Additionally, *Schizophyllum*, which represents the vast majority of the family  
Schizophyllaceae, is reported as a respiratory pathogen. *Schizophyllum* appears to  
234 enhance both the severity and the exacerbation frequency of asthma (29); sensitization to  
*Schizophyllum* is an important risk factor for exacerbation frequency and a rapid decline  
236 in lung function in asthma (30). A previous study suggested that *Candida* may be  
pathogenically important in patients with asthma (31) and associated with severe  
238 exacerbations of asthma requiring hospital admission (32). We found that these  
pathogenic fungi were positively associated with Moraxellaceae and *Moraxella* but  
240 negatively associated with healthy enriched communities such as Leptotrichiaceae and  
*Leptotrichia*, which were more common in the asthma airway. These results suggest that  
242 Moraxellaceae and *Moraxella* have more significant effects on airway fungal  
communities than on bacterial communities. Moraxellaceae and *Moraxella* may influence  
244 the airway microbiome via interactions with the airway mycobiome, thus acting  
synergistically with pathogenic fungi to potentially drive the disease.

246 However, no significant differences were found between stable asthma and  
exacerbated asthma, suggesting that our outpatients with exacerbated asthma had disease  
248 that was extremely mild in severity without dyspnoea and easily controlled during  
exacerbation (33). Consequently, the microbial composition was similar between patients  
250 with exacerbated asthma and those with stable asthma.

Our study is strengthened by its relatively large sample size in China (9, 34) and by  
252 the combined exploration of airway bacterial and fungal communities. A limitation is the

cross-sectional design, which cannot capture the dynamic changes in the airway  
254 microbiome during the progression of asthma.

In conclusion, we have revealed for the first time an increase in fungal  $\alpha$ -diversity  
256 and more severe dysbiosis of fungi than of bacteria in the asthma airway. Importantly, our  
study explored the composition of Moraxellaceae and *Moraxella*, as well as the  
258 microbial-microbial interactions in the airway of asthma, and our results suggest that the  
interaction among Moraxellaceae, *Moraxella* and the airway mycobiome is important for  
260 further understanding airway dysbiosis in asthma. Our findings may provide a foundation  
for new insights on the pathogenic mechanisms of asthma. Further studies are needed to  
262 confirm the cause-effect relationship underlying the interaction of Moraxellaceae,  
*Moraxella* and the airway mycobiome in asthma.

## 264 MATERIALS AND METHODS

**Study design and subjects.** This study was approved by the ethics committee of  
266 Southern Medical University (Permit No. 2012-072). All subjects have provided written  
informed consent, in accordance with the Declaration of Helsinki. A total of 145 sputum  
268 samples were collected from 116 asthma patients and 29 healthy subjects enrolled at  
Nanfang Hospital, Southern Medical University (Guangzhou, China), between June 2015  
270 and December 2016. Subjects provided clinical information including age, gender, forced  
expiratory volume in 1 second (FEV1), forced vital capacity (FVC), smoking history and  
272 use of inhaled corticosteroids (ICS).

Exacerbation of asthma is characterized by a progressive increase in symptoms of dyspnoea, cough, wheezing or chest tightness and a progressive decline of lung function, which represent changes in the patient's usual state.

The inclusion criteria for asthma patients included age >15 years; initial diagnosis based on the Global Initiative for Asthma (GINA) guidelines (35); and a positive bronchodilator reversibility test result (FEV1 increased by >12% and 200 mL after inhaling 400 mg of salbutamol) or positive methacholine provocation test result. All subjects were free of clinical bacterial infection at the time of the study. Exclusion criteria included respiratory tract infection diagnosed by chest X-ray (every patient received a chest X-ray) within the past 4 weeks; the presence of any airway disease other than asthma; and peripheral white blood cell (WBC) counts outside the normal range.

**Sample collection, processing, DNA extraction and 16S rRNA/ITS1 gene amplification.** For sputum induction and processing, the recommendations of the Task Force on Induced Sputum of the European Respiratory Society were used as the guidelines (36, 37). All samples were immediately stored at -80°C for subsequent DNA extraction after collection. The sputum samples were thawed under ventilation for 15 minutes, and genomic DNA extraction was performed using a total genomic DNA Nucleic Acid Extraction Kit (Bioeasy Technology, Inc., China) according to the manufacturer's instructions.

The bacterial 16S rRNA genes and fungal ITS1 genes were amplified using the V4 region and ITS1 region of the genes, respectively. The amplicons were sequenced on an

iTorrent sequencing platform. Detailed information on the DNA amplification and

purification steps was described in our previous studies (38, 39).

**Statistical analysis.** The raw sequence files for both the 16S rRNA V4 amplicons and fungal 18S–28S rRNA gene internally transcribed spacer regions ITS1 amplicons were processed by a barcoded Illumina paired-end sequencing (BIPES) pipeline (40).

First, the barcode primers were trimmed and filtered if they contained ambiguous reads or mismatches in the primer regions according to the BIPES protocol. Then, we removed sequences that had more than one mismatch in the 40–70 bp regions. Next, we screened and removed chimaeras using UCHIME in de novo mode (41), and finally we generated the high-quality sequence reads of the 16S rRNA genes or ITS1 DNA genes.

We used the software pipeline “Quantitative Insights into Microbial Ecology” (QIIME) (1.9.1) to conduct subsequent analyses (42). Operational taxonomic units (OTUs) were clustered by using USEARCH with the default parameters and a threshold distance of .03. The Greengenes 13\_8 database was used as a template file, and multiple alignments of QIIME-based sequences were performed using Python Nearest Alignment Space Termination (PyNAST) (43); representative sequences for the ITS1 gene were assigned with reference to the QIIME\_ITS database (version information: sh\_qiime\_release\_s\_28.06.2017) (42); unclassified sequences were further defined by BLAST according to the closest shared taxonomic level. The representative 16S rRNA gene sequences were classified into specific taxa using the Ribosome Database Project (RDP) classifier (44). The sequences were deposited in the European Nucleotide Archive

(ENA) under accession number PRJEB28853.

Alpha diversity metrics were analysed by the Shannon index, which indicates the evenness and richness of the airway microbial community, and PD\_whole\_tree, which reflects the phylogenesis of species. Beta diversity distances were calculated by principal coordinate analysis (PCoA) using unweighted\_uniFrac distances, and statistical values were evaluated with the Adonis method. Differential features between groups were identified using a linear discriminant analysis (LDA) effect size (LEfSe) method with a threshold cut-off value for the logarithmic LDA score of 2.0. Because of the limitation of statistical power to detect uncommon OTUs, we selected the OTUs with an average relative abundance of >1% in any group. Statistical analyses of clinical parameters were performed using IBM SPSS version 20.0. The graphical representations were generated using GraphPad Prism 5, and the interaction network was constructed using Cytoscape (v3.6.0) (45).

## ACKNOWLEDGMENTS

This research was supported by the Guangzhou Healthcare Collaborative Innovation Major Project [201604020012], the National Key R&D Program of China [2017YFC1310601 and 2017YFC1310603], the National Natural Science Foundation of China [NSFC31570497] and the Open Project of the State Key Laboratory of Respiratory Disease [SKLRD2016OP014].

The authors' responsibilities were as follows. H.L., C.L., H.Z., and J.S. designed the



experiments. H.L., C.L., Z.L., S.Z., M.Y., M.Z., W.Y., and Y.L. collected samples and  
 338 performed the experiments. H.L., C.L., and Z.L. analyzed the data. H.L., C.L., H.Z., and  
 J.S. prepared the manuscript and had primary responsibility for final content. All authors  
 340 read and approved the final manuscript. None of the authors reported a conflict of  
 interest.

342 We thank the patients, clinical doctors and microbiology staff who supported this  
 work. We thank American Journal Experts (AJE) for English language editing.

344

## REFERENCES

1. Bousquet J, Mantzouranis E, Cruz AA, Ait-Khaled N, Baena-Cagnani CE, Bleecker ER, Brightling CE, Burney P, Bush A, Busse WW, Casale TB, Chan-Yeung M, Chen R, Chowdhury B, Chung KF, Dahl R, Drazen JM, Fabbri LM, Holgate ST, Kauffmann F, Haahtela T, Khaltaev N, Kiley JP, Masjedi MR, Mohammad Y, O'Byrne P, Partridge MR, Rabe KF, Togias A, van Weel C, Wenzel S, Zhong N, Zuberbier T. 2010. Uniform definition of asthma severity, control, and exacerbations: document presented for the World Health Organization Consultation on Severe Asthma. *J Allergy Clin Immunol* 126:926-938.
2. Hilty M, Burke C, Pedro H, Cardenas P, Bush A, Bossley C, Davies J, Ervine A, Poulter L, Pachter L, Moffatt MF, Cookson WO. 2010. Disordered microbial communities in asthmatic airways. *PLoS One* 5:e8578.
3. Erb-Downward JR, Thompson DL, Han MK, Freeman CM, McCloskey L, Schmidt LA, Young VB, Toews GB, Curtis JL, Sundaram B, Martinez FJ, Huffnagle GB. 2011. Analysis of the lung microbiome in the "healthy" smoker and in COPD. *PLoS One* 6:e16384.
4. Charlson ES, Bittinger K, Haas AR, Fitzgerald AS, Frank I, Yadav A, Bushman FD, Collman RG. 2011. Topographical continuity of bacterial populations in the healthy human respiratory tract. *Am J Respir Crit Care Med* 184:957-963.
5. Bisgaard H, Hermansen MN, Buchvald F, Loland L, Halkjaer LB, Bonnelykke K, Brasholt M, Heltberg A, Vissing NH, Thorsen SV, Stage M, Phipps CB. 2007. Childhood asthma after bacterial colonization of the airway in neonates. *N Engl J Med* 357:1487-1495.
6. Beigelman A, Weinstock GM, Bacharier LB. 2014. The relationships between environmental bacterial exposure, airway bacterial colonization, and asthma. *Curr Opin Allergy Clin Immunol* 14:137-142.
7. Huang YJ, Boushey HA. 2015. The microbiome in asthma. *J Allergy Clin Immunol* 135:25-30.
8. Taylor SL, Leong LEX, Choo JM, Wesselingh S, Yang IA, Upham JW, Reynolds PN, Hodge S, James AL, Jenkins C, Peters MJ, Baraket M, Marks GB, Gibson PG, Simpson JL, Rogers GB. 2018. Inflammatory phenotypes in patients with severe asthma are associated with distinct airway microbiology. *J Allergy Clin Immunol* 141:94-103 e115.
9. Li N, Qiu R, Yang Z, Li J, Chung KF, Zhong N, Zhang Q. 2017. Sputum microbiota in severe asthma patients: Relationship to eosinophilic inflammation. *Respir Med* 131:192-198.
10. Green BJ, Wiriyaichaiorn S, Grainge C, Rogers GB, Kehagia V, Lau L, Carroll MP, Bruce KD, Howarth PH. 2014. Potentially pathogenic airway bacteria and neutrophilic inflammation in treatment resistant severe asthma. *PLoS One* 9:e100645.
11. Verduin CM, Hol C, Fleer A, van Dijk H, van Belkum A. 2002. *Moraxella catarrhalis*: from Emerging to Established Pathogen. *Clin Microbiol Rev* 15:125-144.
12. Bisgaard H, Hermansen MN, Bonnelykke K, Stokholm J, Baty F, Skytt NL, Aniscenko J, Kebabdzian T, Johnston SL. 2010. Association of bacteria and viruses with wheezy episodes in young children: prospective birth cohort study. *BMJ* 341:c4978.
13. Cazzola M, Matera MG, Rossi F. 1991. Bronchial hyperresponsiveness and bacterial respiratory infections. *Clin Ther* 13:157-171.

14. Aliouat-Denis CM, Chabe M, Delhaes L, Dei-Cas E. 2014. Aerially transmitted human fungal pathogens: what can we learn from metagenomics and comparative genomics? *Rev Iberoam Micol* 31:54-61.
15. HC. vW, Gregory. C, Brown. R, Marchesi. JR, Hoogendoorn. B, Matthews. IP. 2013. Differences in fungi present in induced sputum samples from asthma patients and non-atopic controls. *BioMed Central* 13:69-74.
16. Kyda J, Krishnamurthya A, McGratha J, Brownea J, Vahedia F. 2011. Airway Bacterial Interactions and Impact on Host Immune Responses. *Adv Otorhinolaryngol* 72:116–120.
17. Twomey KB, O'Connell OJ, McCarthy Y, Dow JM, O'Toole GA, Plant BJ, Ryan RP. 2012. Bacterial cis-2-unsaturated fatty acids found in the cystic fibrosis airway modulate virulence and persistence of *Pseudomonas aeruginosa*. *ISME J* 6:939-950.
18. Nguyen LD, Viscogliosi E, Delhaes L. 2015. The lung mycobiome: an emerging field of the human respiratory microbiome. *Front Microbiol* 6:89-97.
19. Short FL, Murdoch SL, Ryan RP. 2014. Polybacterial human disease: the ills of social networking. *Trends Microbiol* 22:508-516.
20. Lu J, Xiong L, Zhang X, Liu Z, Wang S, Zhang C, Zheng J, Wang G, Zheng R, Simpson JL, Wang F. 2017. The Role of Lower Airway Dysbiosis in Asthma: Dysbiosis and Asthma. *Mediators Inflamm* 2017:3890601.
21. Singanayagam A, Ritchie AI, Johnston SL. 2017. Role of microbiome in the pathophysiology and disease course of asthma. *Curr Opin Pulm Med* 23:41-47.
22. Huang YJ, Nelson CE, Brodie EL, Desantis TZ, Baek MS, Liu J, Woyke T, Allgaier M, Bristow J, Wiener-Kronish JP, Sutherland ER, King TS, Icitovic N, Martin RJ, Calhoun WJ, Castro M, Denlinger LC, Dimango E, Kraft M, Peters SP, Wasserman SI, Wechsler ME, Boushey HA, Lynch SV, National Heart L, Blood Institute's Asthma Clinical Research N. 2011. Airway microbiota and bronchial hyperresponsiveness in patients with suboptimally controlled asthma. *J Allergy Clin Immunol* 127:372-381 e371-373.
23. Marri PR, Stern DA, Wright AL, Billheimer D, Martinez FD. 2013. Asthma-associated differences in microbial composition of induced sputum. *J Allergy Clin Immunol* 131:346-352 e341-343.
24. Goleva E, Jackson LP, Harris JK, Robertson CE, Sutherland ER, Hall CF, Good JT, Jr., Gelfand EW, Martin RJ, Leung DY. 2013. The effects of airway microbiome on corticosteroid responsiveness in asthma. *Am J Respir Crit Care Med* 188:1193-1201.
25. Huang YJ, Nariya S, Harris JM, Lynch SV, Choy DF, Arron JR, Boushey H. 2015. The airway microbiome in patients with severe asthma: Associations with disease features and severity. *J Allergy Clin Immunol* 136:874-884.
26. Durack J, Lynch SV, Nariya S, Bhakta NR, Beigelman A, Castro M, Dyer AM, Israel E, Kraft M, Martin RJ, Mauger DT, Rosenberg SR, Sharp-King T, White SR, Woodruff PG, Avila PC, Denlinger LC, Holguin F, Lazarus SC, Lugogo N, Moore WC, Peters SP, Que L, Smith LJ, Sorkness CA, Wechsler ME, Wenzel SE, Boushey HA, Huang YJ, National Heart L, Blood Institute's A. 2017. Features of the bronchial bacterial microbiome associated with atopy, asthma, and responsiveness to inhaled corticosteroid treatment. *J Allergy Clin Immunol* 140:63-75.

27. Denner DR, Sangwan N, Becker JB, Hogarth DK, Oldham J, Castillo J, Sperling AI, Solway J, Naureckas ET, Gilbert JA, White SR. 2016. Corticosteroid therapy and airflow obstruction influence the bronchial microbiome, which is distinct from that of bronchoalveolar lavage in asthmatic airways. *J Allergy Clin Immunol* 137:1398-1405 e1393.
28. Wargo MJ, Hogan DA. 2006. Fungal--bacterial interactions: a mixed bag of mingling microbes. *Curr Opin Microbiol* 9:359-364.
29. Ogawa H, Fujimura M, Takeuchi Y, Makimura K. 2011. The influence of *Schizophyllum commune* on asthma severity. *Lung* 189:485-492.
30. Ogawa H, Fujimura M, Takeuchi Y, Makimura K. 2013. Impact of *Schizophyllum* sensitization on decline of lung function in asthma. *J Asthma* 50:764-768.
31. Khosravi AR, Bandghorai AN, Moazzeni M, Shokri H, Mansouri P, Mahmoudi M. 2009. Evaluation of *Candida albicans* allergens reactive with specific IgE in asthma and atopic eczema patients. *Mycoses* 52:326-333.
32. O'Driscoll BR, Hopkinson LC, Denning DW. 2005. Mold sensitization is common amongst patients with severe asthma requiring multiple hospital admissions. *BMC Pulm Med* 5:4-13.
33. Demoly P, Crestani B, Leroyer C, Magnan A, Mounedji N, Humbert M. 2004. Control and exacerbation of asthma: a survey of more than 3000 French physicians. *Allergy* 59:920-926.
34. Zhang Q, Cox M, Liang Z, Brinkmann F, Cardenas PA, Duff R, Bhavsar P, Cookson W, Moffatt M, Chung KF. 2016. Airway Microbiota in Severe Asthma and Relationship to Asthma Severity and Phenotypes. *PLoS One* 11:e0152724.
35. Accordini S, Cappa V, Braggion M, Corsico AG, Bugiani M, Pirina P, Verlato G, Villani S, de Marco R. 2011. The impact of diagnosed and undiagnosed current asthma in the general adult population. *Int Arch Allergy Immunol* 155:403-411.
36. Chanez P, Holz O, Ind PW, Djukanovic R, Maestrelli P, Sterk PJ. 2002. Sputum induction. *Eur Respir J* 20:3S-8s.
37. Djukanovic R, Sterk PJ, Fahy JV, Hargreave FE. 2002. Standardised methodology of sputum induction and processing. *Eur Respir J* 20:1S-2s.
38. He Y, Zhou BJ, Deng GH, Jiang XT, Zhang H, Zhou HW. 2013. Comparison of microbial diversity determined with the same variable tag sequence extracted from two different PCR amplicons. *BMC Microbiol* 13:208-215.
39. Su J, Liu HY, Tan XL, Ji Y, Jiang YX, Prabhakar M, Rong ZH, Zhou HW, Zhang GX. 2015. Sputum Bacterial and Fungal Dynamics during Exacerbations of Severe COPD. *PLoS One* 10:e0130736.
40. Zhou HW, Li DF, Tam NF, Jiang XT, Zhang H, Sheng HF, Qin J, Liu X, Zou F. 2011. BIPES, a cost-effective high-throughput method for assessing microbial diversity. *ISME J* 5:741-749.
41. Edgar RC, Haas BJ, Clemente JC, Quince C, Knight R. 2011. UCHIME improves sensitivity and speed of chimera detection. *Bioinformatics* 27:2194-2200.
42. Caporaso JG, Kuczynski J, Stombaugh J, Bittinger K, Bushman FD, Costello EK, Fierer N, Pena AG, Goodrich JK, Gordon JI, Huttley GA, Kelley ST, Knights D, Koenig JE, Ley RE, Lozupone CA, McDonald D, Muegge BD, Pirrung M, Reeder J, Sevinsky JR, Turnbaugh PJ, Walters WA, Widmann J, Yatsunenko T, Zaneveld J, Knight R. 2010. QIIME allows analysis of high-throughput community sequencing data. *Nat Methods* 7:335-336.

- 466 43. Al-Hebshi NN, Nasher AT, Idris AM, Chen T. 2015. Robust species taxonomy assignment algorithm  
for 16S rRNA NGS reads: application to oral carcinoma samples. J Oral Microbiol 7:28934.
- 468 44. Wang Q, Garrity GM, Tiedje JM, Cole JR. 2007. Naive Bayesian classifier for rapid assignment of  
rRNA sequences into the new bacterial taxonomy. Appl Environ Microbiol 73:5261-5267.
- 470 45. Paul Shannon, Andrew Markiel, Owen Ozier, Nitin S. Baliga, Jonathan T. Wang, Daniel Ramage,  
Nada Amin, Benno Schwikowski, Ideker T. 2003. Cytoscape: A Software Environment for  
472 Integrated Models of Biomolecular Interaction Networks. Genome Res 13:2498-2504.

474

# Figure Legends

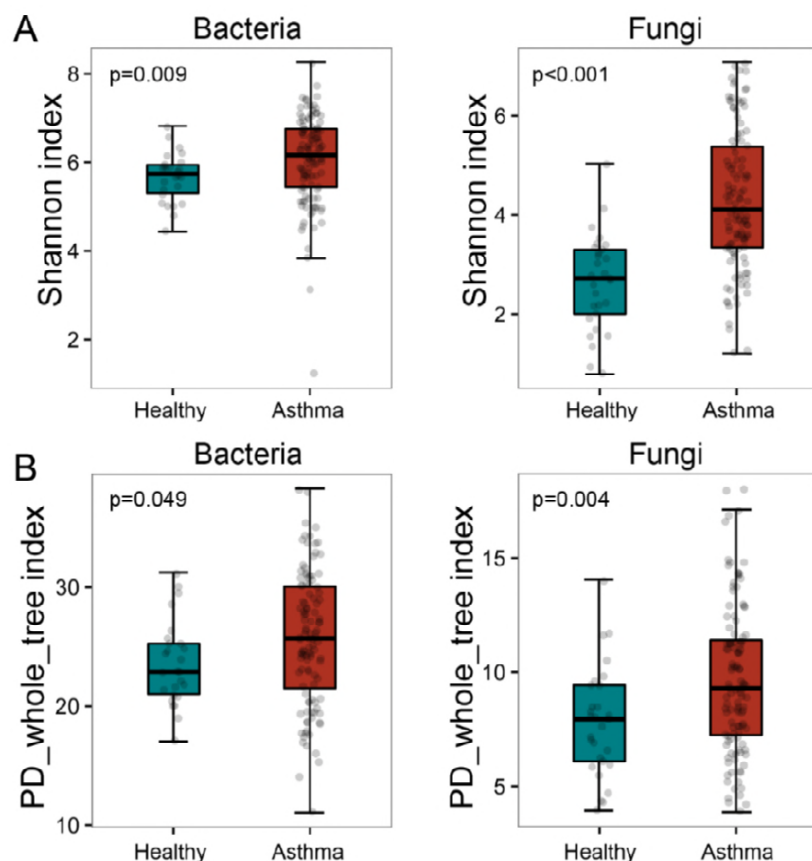

FIG 1  $\alpha$ -Diversity of the bacterial and fungal communities in healthy individuals and asthma patients. The Shannon index (A) indicates the evenness and richness diversity of the airway microbial community, and PD\_whole\_tree index (B) reflects the phylogenesis diversity of the airway microbial community. P values are presented using the Wilcoxon rank-sum test.

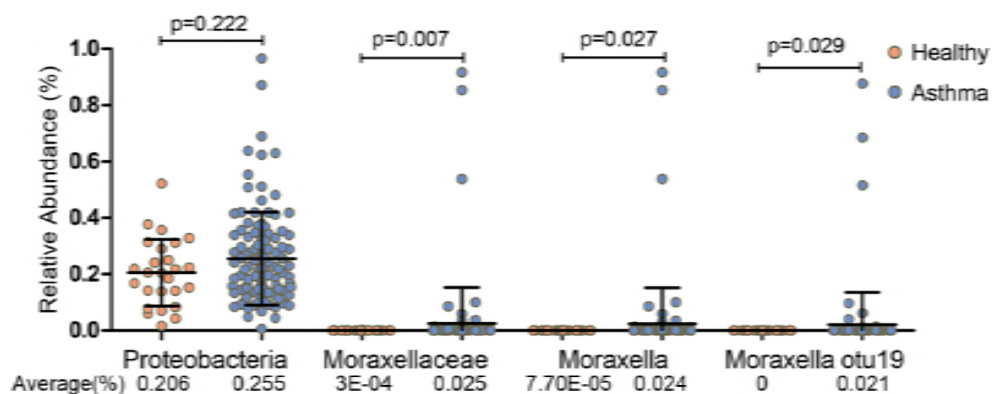

FIG 2 Comparison of the relative abundance of Proteobacteria, Moraxellaceae, *Moraxella* and *Moraxella* otu19 between healthy individuals and asthma patients. P values (Wilcoxon rank-sum test) and average relative abundances are presented.

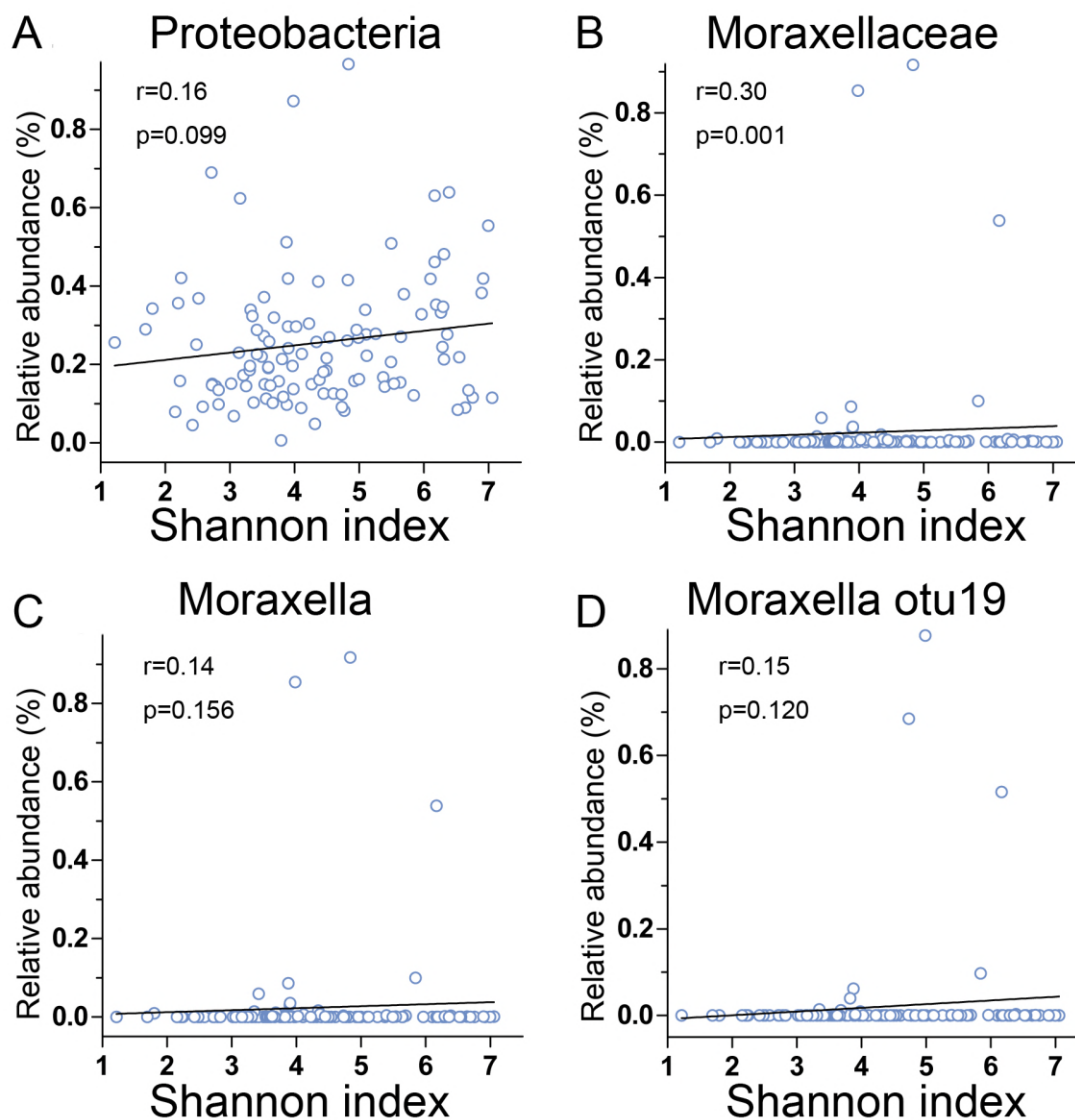

FIG 3 The relationships between Proteobacteria, Moraxellaceae, *Moraxella* and *Moraxella* otu19 and fungal  $\alpha$ -diversity. R (cut-off of over 0.3) and P values are presented using Spearman rank correlation analysis.



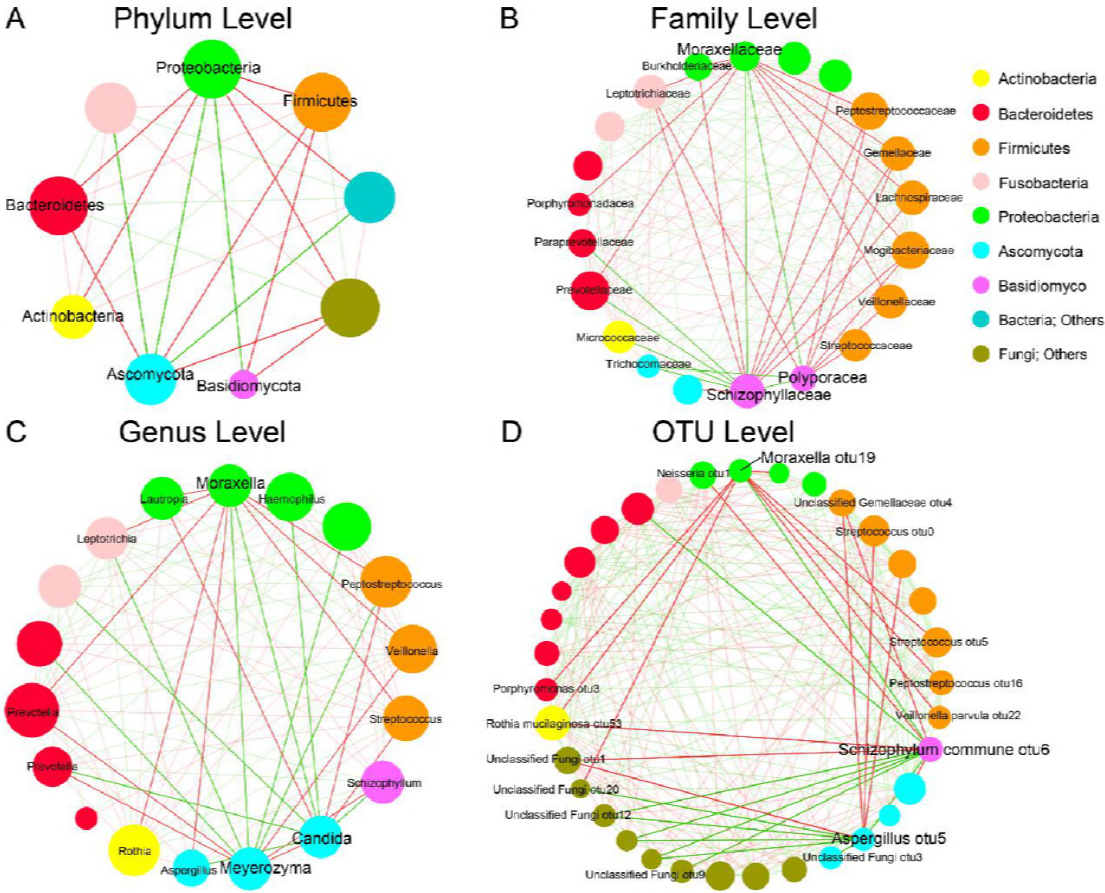

FIG 4 Correlation networks between airway microbial communities (microbial communities with a relative abundance of >1% are included) at the phylum (A), family (B), genus (C), and OTU (D) levels. Each node represents a microbial community, and its diameter is proportional to the degree of connectivity. The microbial communities are coloured by the phylum level. The red edges represent negative correlations, and the green edges represent positive correlations. The darker grey lines connect “hub” microbial communities that may play an important role in the asthmatic airway, and the lighter grey lines connect other airway microbial communities. Correlations were performed with Spearman rank correlation with a correlation cut-off P value of less than 0.05.

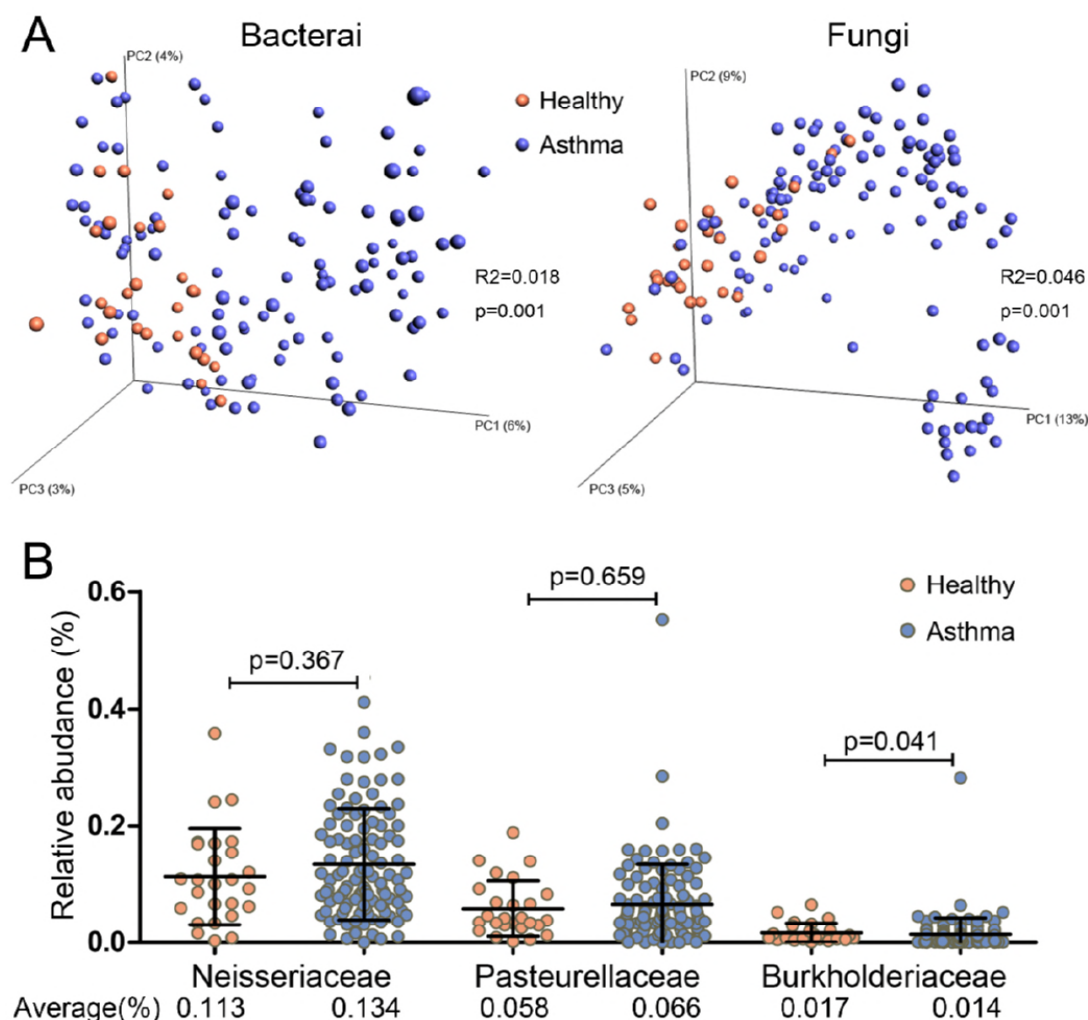

FIG S1 (A) Principal coordinate analysis ( $\beta$ -diversity) based on the unweighted\_uniFrac distance of each sample of bacterial and fungal community between healthy individuals and asthma patients. (B) The relative abundances of the other families belonging to Proteobacteria compared between asthma patients and healthy individuals. P values (Wilcoxon rank-sum test) and the average relative abundance are presented.

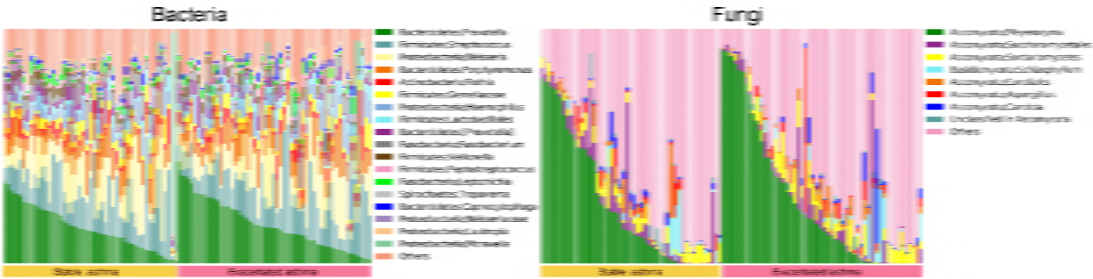

510 FIG S2 Taxonomic profiles of the most abundant airway bacterial and fungal genera in  
each sample from patients with stable asthma and exacerbated asthma. Genera with a  
512 relative abundance higher than 1% in any group are presented; other genera are classified  
as “Others”.

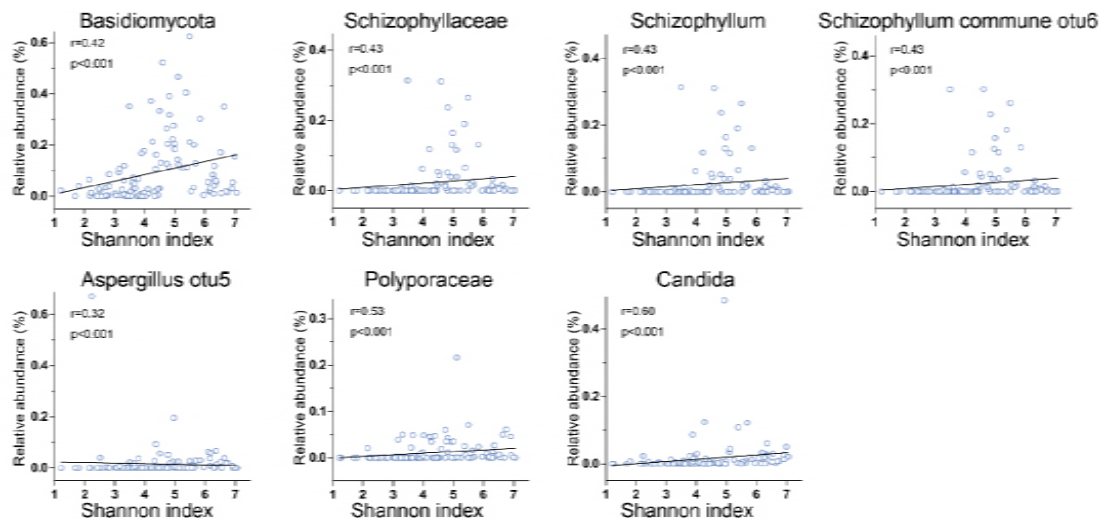

FIG S3 The relationship between fungal communities and fungal  $\alpha$ -diversity. R (cut-off of over 0.3) and P values are presented using Spearman correlation analysis.

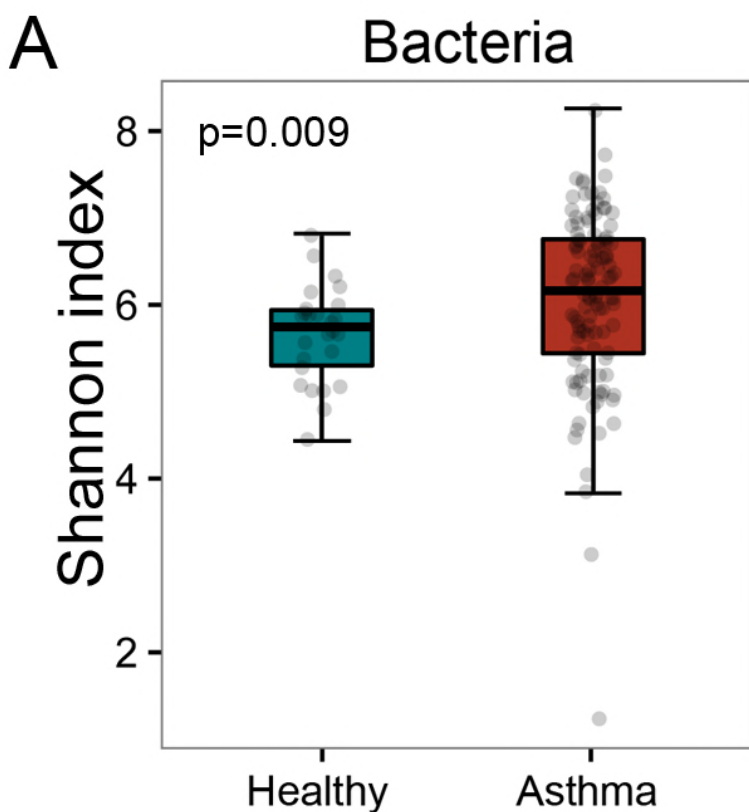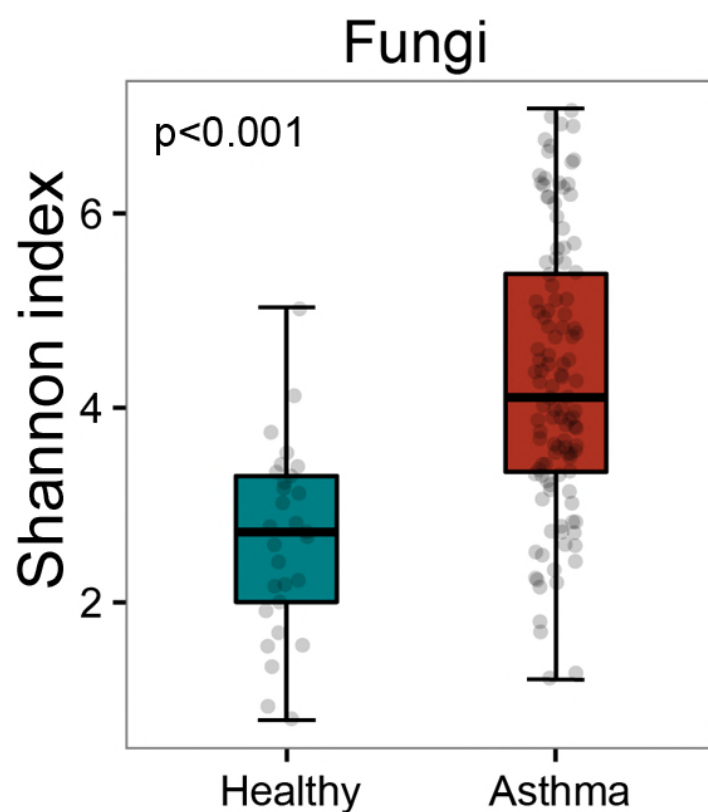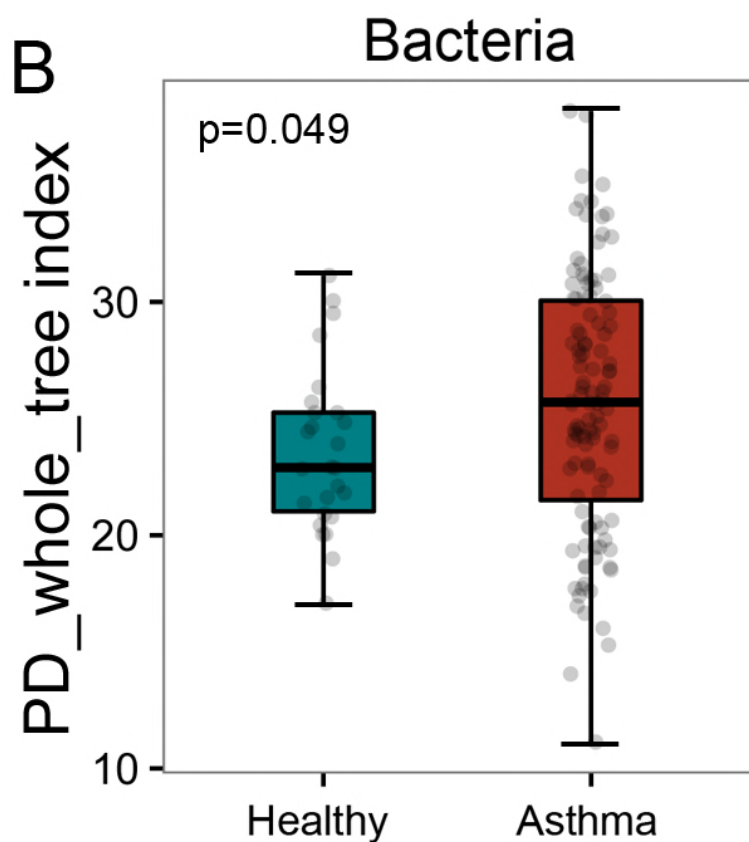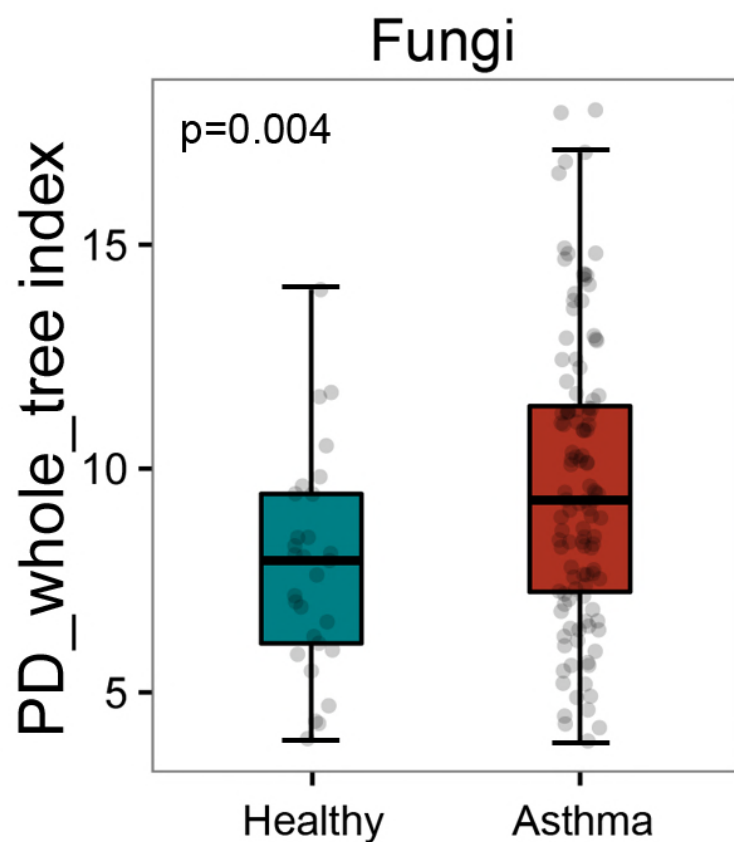

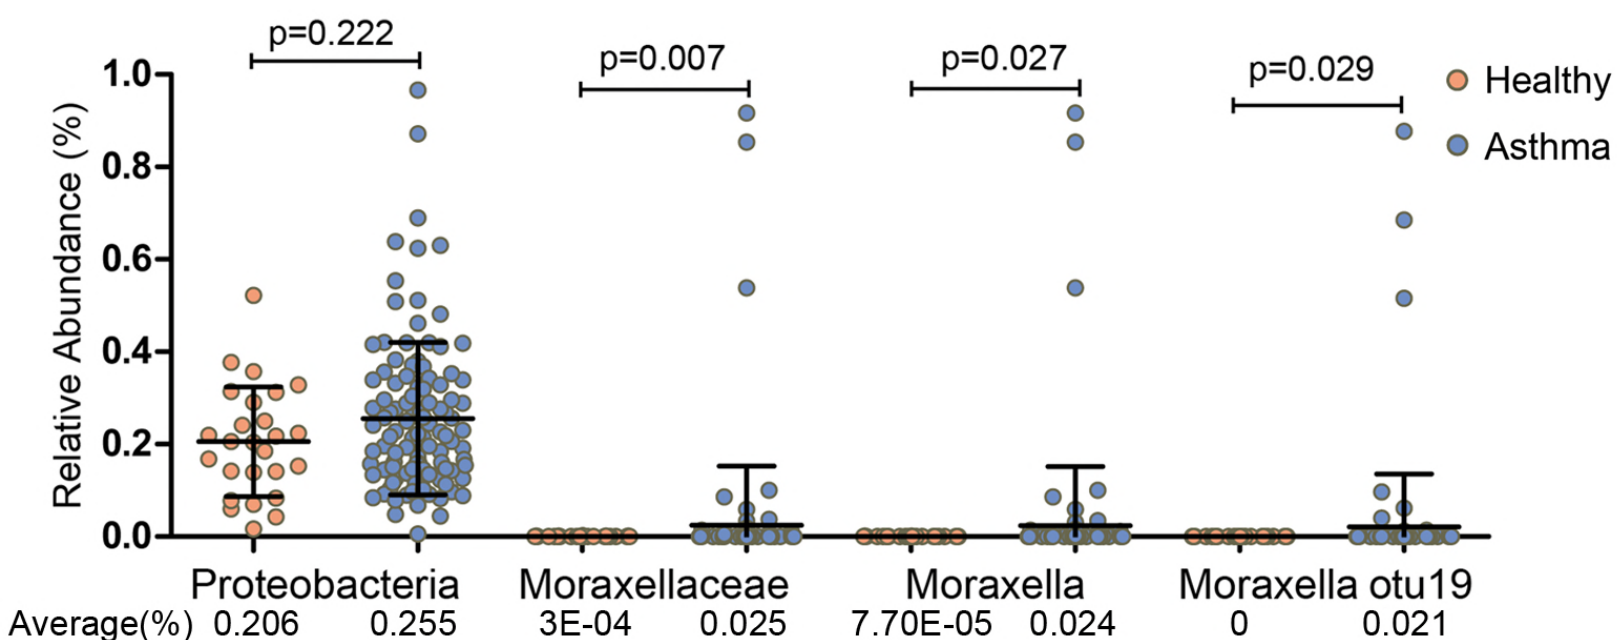



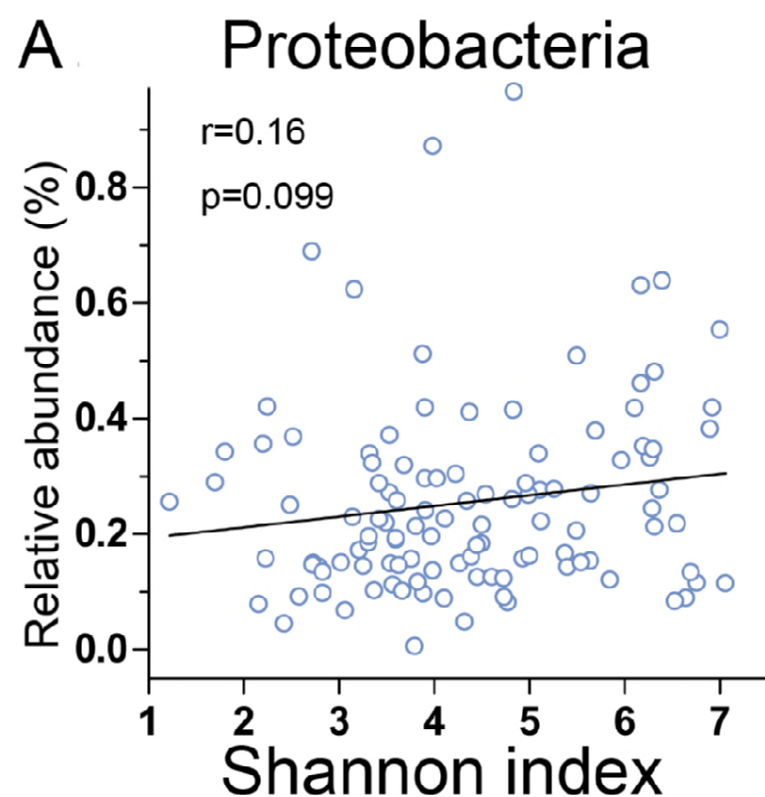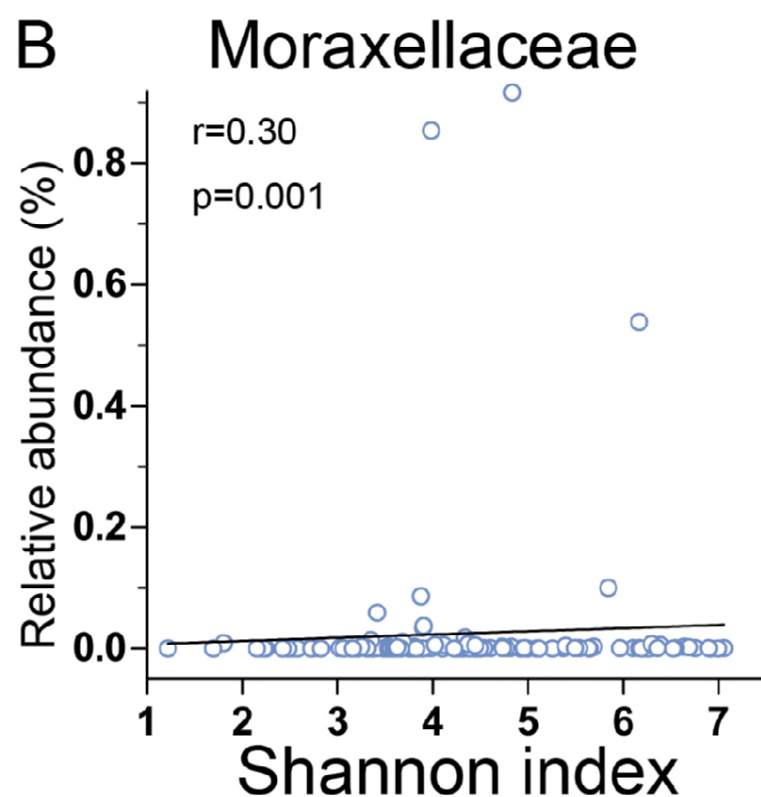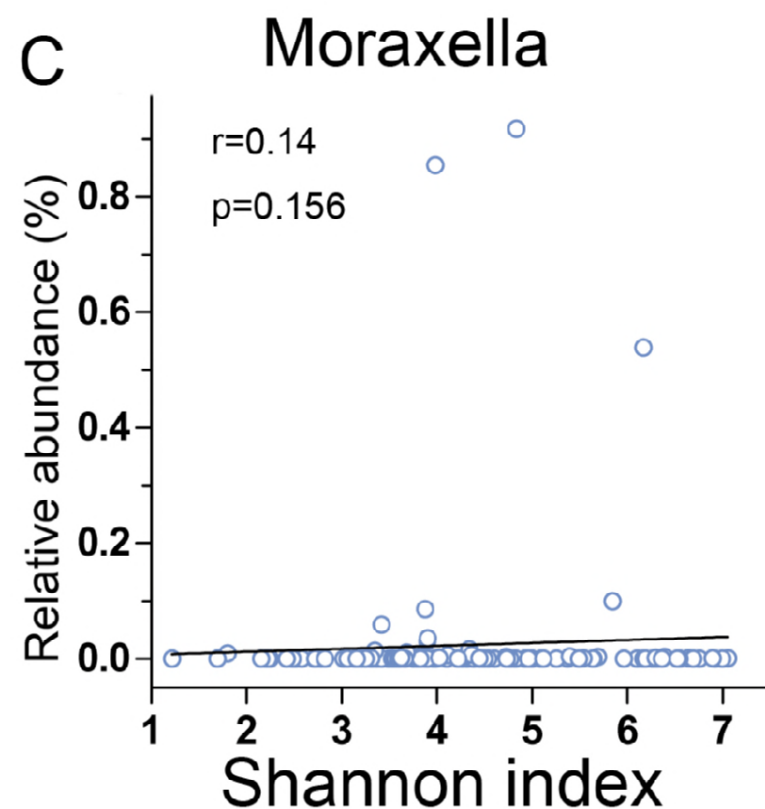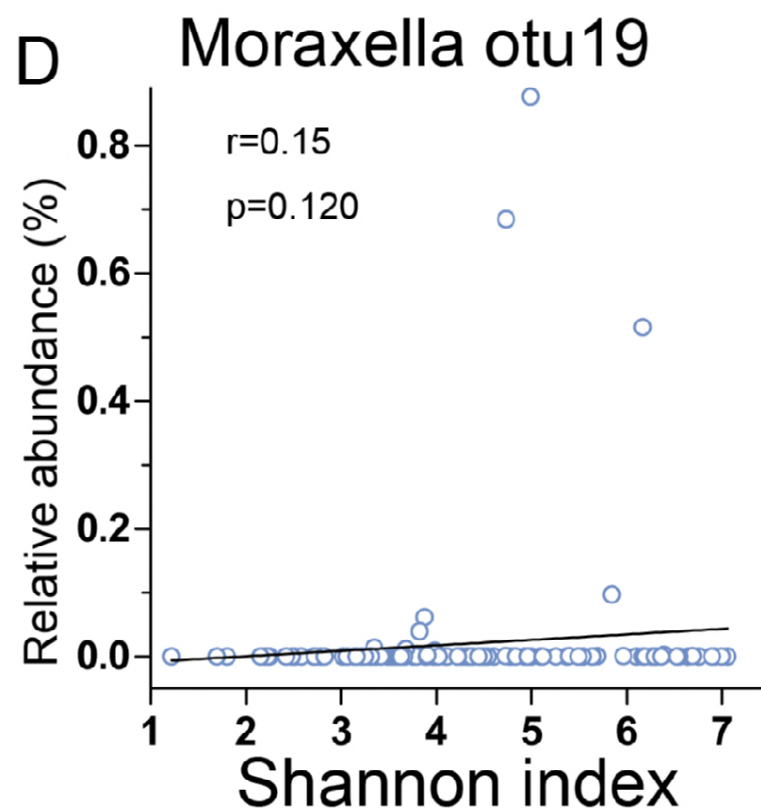

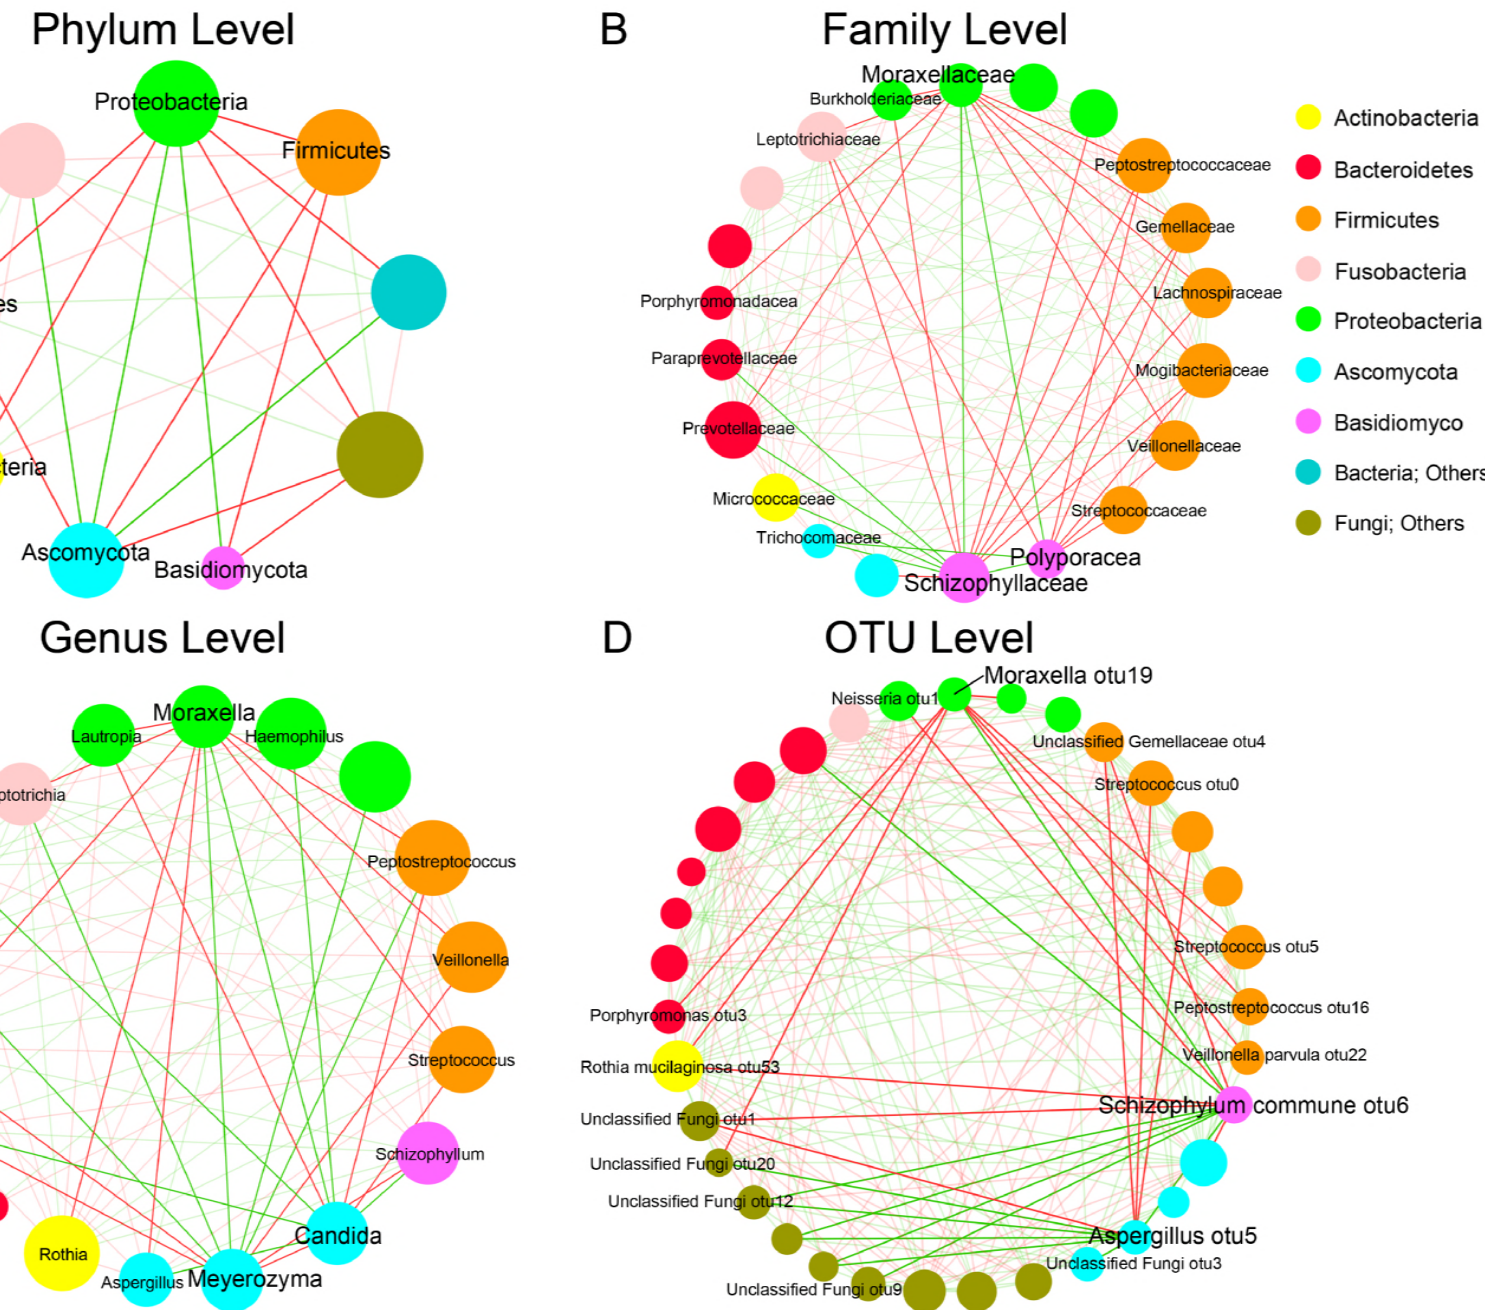



TABLE 1 Clinical characteristics of the subjects

| Parameters              | Healthy<br>(n=29) | Asthma<br>(n=116) | <i>P</i> value | Stable asthma<br>(n=55) | Exacerbated asthma<br>(n=61) | <i>P</i> value |
|-------------------------|-------------------|-------------------|----------------|-------------------------|------------------------------|----------------|
| Age (years)             | 44.3±23.1         | 42.7±14.0         | .733           | 41.4±12.8               | 44.0±15.1                    | .480           |
| Gender, n (male:female) | 21:8              | 62:54             | .065           | 28:27                   | 34:27                        | .603           |
| FEV1 (% pred)           | NA                | 87.9±18.8         | NA             | 89.6±16.9               | 86.5±2.4                     | .934           |
| FVC (% pred)            | NA                | 101.9±16.4        | NA             | 102.3±15.6              | 101.5±17.2                   | .506           |
| FEV1/FVC (%)            | NA                | 86.7±14.6         | NA             | 87.9±12.6               | 85.7±16.2                    | .771           |
| Smoking, n (yes:no)     | 9:20              | 24:91             | .244           | 11:44                   | 13:47                        | .826           |
| ICS, n (yes:no)         | NA                | 78:38             | NA             | 43:12                   | 35:26                        | .017*          |

FEV1: forced expiratory volume in 1 second, FVC: forced vital capacity, ICS: inhaled corticosteroids.

The data are presented as n (chi-square test) or as the mean±standard deviation (independent t-test \* represents  $P<.05$ ).
